# Supplementary material for: Are Linguistic Prediction Deficits Characteristic of Adults with Dyslexia?
Source: MDPI journal article supplement (doi:10.3390/brainsci11010059), 2021-01-06

## Supplementary Materials

### Section A

Results of linear mixed effects model, including the R code and output.

```
paul_model2<-lmer(RT ~ continuation*constraint*group+(1+continuation|subject) +  
(1|item), data=paul, REML=FALSE)
```

```
summary(paul_model2)
```

```
Linear mixed model fit by maximum likelihood . t-tests use Satterthwaite's method ['lmerModLmerTest']  
Formula: RT ~ continuation * constraint * group + (1 + continuation | subject) + (1 | item)  
Data: paul  
  
      AIC      BIC    logLik deviance df.resid  
80379.6 80465.2 -40176.8 80353.6     5318  
  
Scaled residuals:  
   Min       1Q   Median       3Q      Max  
-2.8134 -0.5453 -0.1447  0.3257  8.2457  
  
Random effects:  
Groups   Name              Variance Std.Dev. Corr  
item     (Intercept)        15992   126.46  
subject  (Intercept)        97292   311.92  
         continuation1    4891    69.94  -0.32  
Residual                   187853  433.42  
Number of obs: 5331, groups: item, 104; subject, 84  
  
Fixed effects:  
              Estimate Std. Error    df t value Pr(>|t|)  
(Intercept)      1388.75     55.59 121.34 24.982 < 2e-16 ***  
continuation1     -30.71     29.00 303.36 -1.059 0.29035  
constraint1       23.01     35.70 264.23  0.644 0.51981  
group1           -215.27     72.82  96.14 -2.956 0.00392 **  
continuation1:constraint1 -144.38     35.56 5166.28 -4.060 4.97e-05 ***  
continuation1:group1 -110.38     39.01 281.76 -2.829 0.00500 **  
constraint1:group1  -37.42     34.74 5077.33 -1.077 0.28146  
continuation1:constraint1:group1 110.56     48.00 5069.86  2.304 0.02129 *  
---  
Signif. codes:  0 '***' 0.001 '**' 0.01 '*' 0.05 '.' 0.1 ' ' 1  
  
Correlation of Fixed Effects:  
      (Intr) cntnt1 cnstr1 group1 cntntnl:c1 cntntnl:g1 cns1:l  
continuatnl -0.335  
constraint1 -0.360 0.354  
group1      -0.671 0.242 0.132  
cntntnl:c1  0.185 -0.688 -0.520 -0.132  
cntntnl:g1  0.235 -0.688 -0.245 -0.350 0.475  
cnstrntl:g1  0.177 -0.340 -0.498 -0.263 0.501 0.491  
cntntnl:l1 -0.128 0.474 0.359 0.190 -0.691 -0.688 -0.724  
convergence code: 0
```

Simultaneous Tests for General Linear Hypotheses

Multiple Comparisons of Means: Tukey Contrasts

Fit: lmer(formula = RT ~ tw + (1 + continuation \* constraint | subject) +  
(1 + group | item), data = paul, REML = FALSE)

Linear Hypotheses:

|                    | Estimate | Std. Error | z value | Pr(> z )    |
|--------------------|----------|------------|---------|-------------|
| 1.0.0 - 0.0.0 == 0 | -29.76   | 29.45      | -1.010  | 0.95535     |
| 0.1.0 - 0.0.0 == 0 | 22.64    | 38.04      | 0.595   | 0.99799     |
| 1.1.0 - 0.0.0 == 0 | -151.59  | 39.54      | -3.834  | 0.00216 **  |
| 0.0.1 - 0.0.0 == 0 | -216.25  | 73.79      | -2.930  | 0.04630 *   |
| 1.0.1 - 0.0.0 == 0 | -356.44  | 74.16      | -4.806  | < 0.001 *** |
| 0.1.1 - 0.0.0 == 0 | -230.17  | 77.29      | -2.978  | 0.04034 *   |
| 1.1.1 - 0.0.0 == 0 | -405.48  | 74.71      | -5.427  | < 0.001 *** |
| 0.1.0 - 1.0.0 == 0 | 52.40    | 39.32      | 1.332   | 0.83435     |
| 1.1.0 - 1.0.0 == 0 | -121.83  | 37.46      | -3.252  | 0.01749 *   |
| 0.0.1 - 1.0.0 == 0 | -186.49  | 74.11      | -2.516  | 0.13858     |
| 1.0.1 - 1.0.0 == 0 | -326.68  | 73.75      | -4.429  | < 0.001 *** |
| 0.1.1 - 1.0.0 == 0 | -200.41  | 77.34      | -2.591  | 0.11557     |
| 1.1.1 - 1.0.0 == 0 | -375.72  | 74.59      | -5.037  | < 0.001 *** |
| 1.1.0 - 0.1.0 == 0 | -174.23  | 26.46      | -6.585  | < 0.001 *** |
| 0.0.1 - 0.1.0 == 0 | -238.88  | 77.02      | -3.102  | 0.02785 *   |
| 1.0.1 - 0.1.0 == 0 | -379.08  | 77.09      | -4.917  | < 0.001 *** |
| 0.1.1 - 0.1.0 == 0 | -252.81  | 72.24      | -3.500  | 0.00744 **  |
| 1.1.1 - 0.1.0 == 0 | -428.12  | 69.67      | -6.145  | < 0.001 *** |
| 0.0.1 - 1.1.0 == 0 | -64.66   | 74.33      | -0.870  | 0.98027     |
| 1.0.1 - 1.1.0 == 0 | -204.85  | 74.24      | -2.759  | 0.07515 .   |
| 0.1.1 - 1.1.0 == 0 | -78.58   | 69.56      | -1.130  | 0.92159     |
| 1.1.1 - 1.1.0 == 0 | -253.89  | 66.29      | -3.830  | 0.00220 **  |
| 1.0.1 - 0.0.1 == 0 | -140.20  | 28.51      | -4.918  | < 0.001 *** |
| 0.1.1 - 0.0.1 == 0 | -13.93   | 34.40      | -0.405  | 0.99984     |
| 1.1.1 - 0.0.1 == 0 | -189.24  | 35.85      | -5.279  | < 0.001 *** |
| 0.1.1 - 1.0.1 == 0 | 126.27   | 35.77      | 3.530   | 0.00674 **  |
| 1.1.1 - 1.0.1 == 0 | -49.04   | 33.76      | -1.453  | 0.76583     |
| 1.1.1 - 0.1.1 == 0 | -175.31  | 25.65      | -6.835  | < 0.001 *** |

---

Signif. codes: 0 '\*\*\*' 0.001 '\*\*' 0.01 '\*' 0.05 '.' 0.1 ' ' 1  
(Adjusted p values reported -- single-step method)

**Continuation (low = 0, high = 1)**

**Constraint (low = 0, high = 1)**

**Group (Control = 1, dyslexia = 0)**

## Section B

Scatterplot showing the line of best fit. The x-axis has items based on cloze probability and the y-axis shows mean reaction time. The biggest difference between the groups is the results from the low continuation condition. For controls, there is clear separation between the high- and low-continuations across the full range of cloze probability. For dyslexics, there is no separation between high- and low-continuation at the low end of cloze probability. However, for both groups, the low-continuation condition ends up being no different from the anomalous condition.

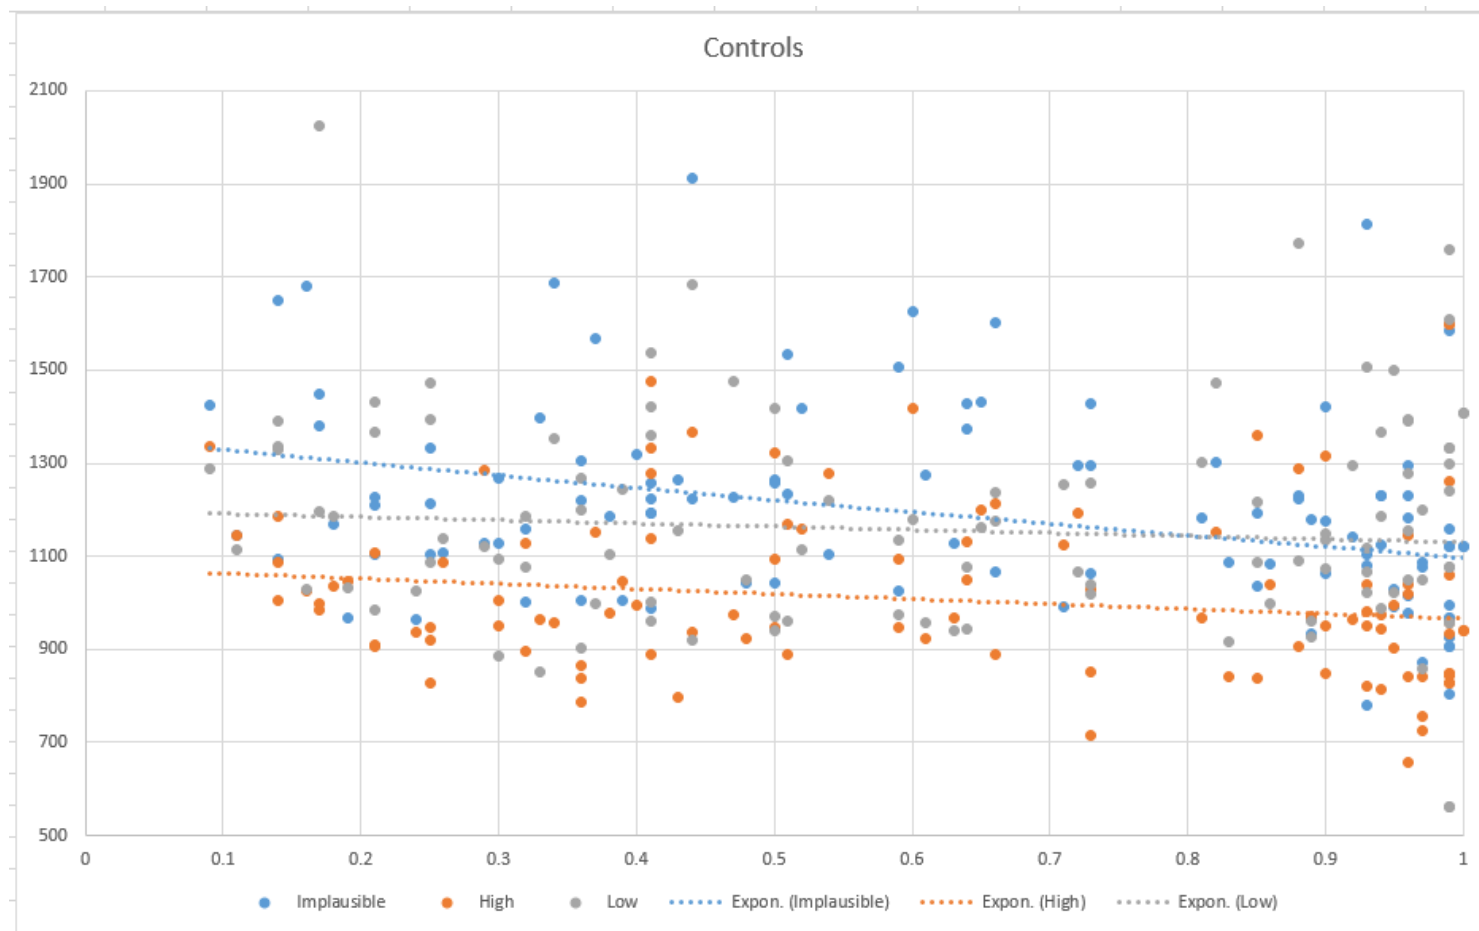

### Dyslexic

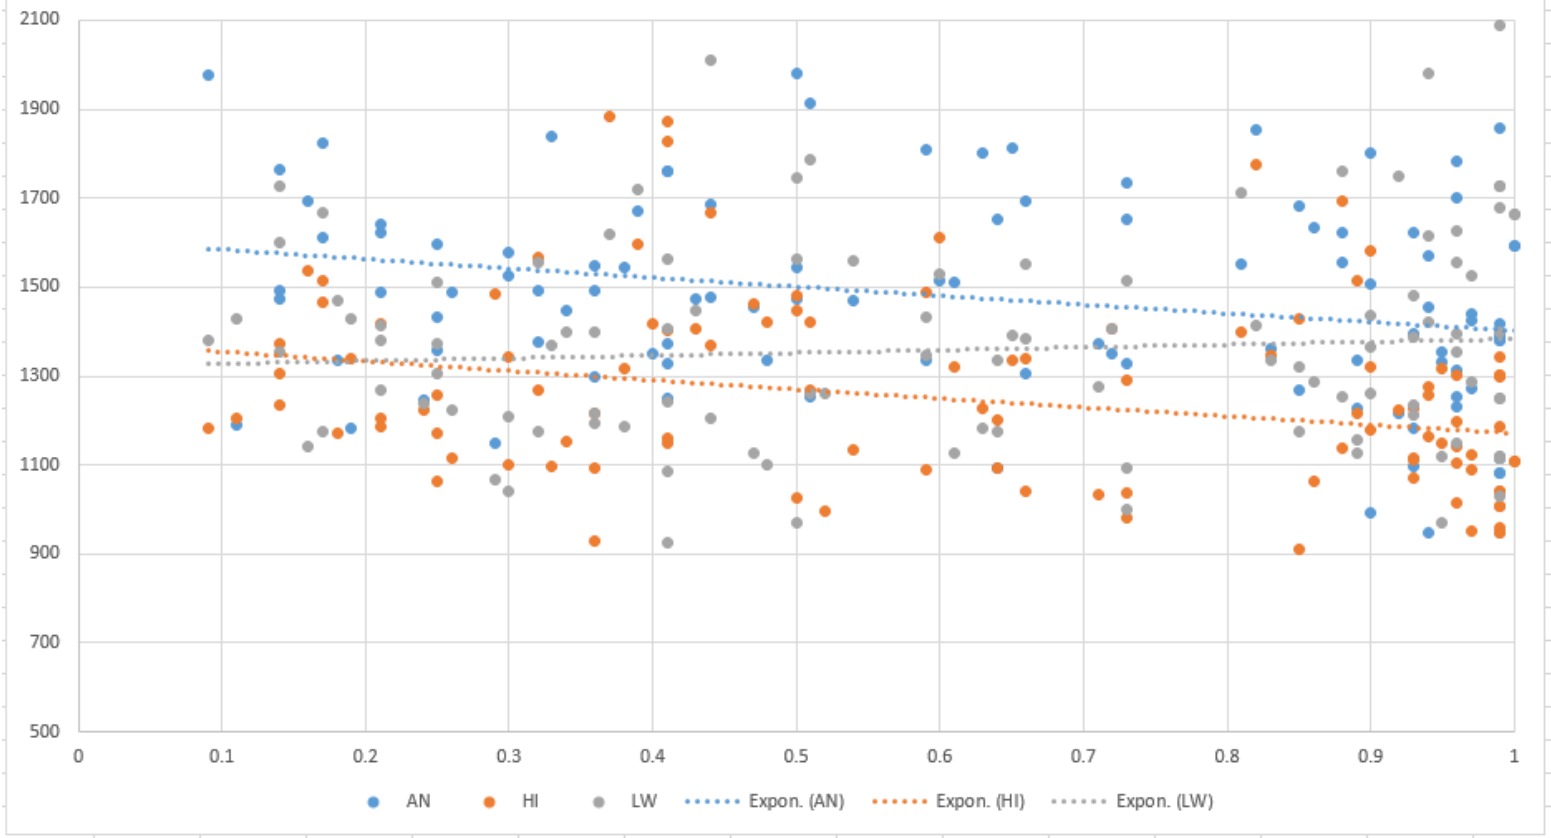

Supplement: s1 [file s1]
